# Supplementary material for: Enhanced leaf turnover and nitrogen recycling sustain CO2 fertilization effect on tree-ring growth
Source: Springer Nature journal article supplement (doi:10.1038/s41559-022-01811-1), 2022-07-11
Supplement: 41559_2022_1811_MOESM1_ESM.pdf [file 41559_2022_1811_MOESM1_ESM.pdf]

---

**Supplementary information**

---

**Enhanced leaf turnover and nitrogen recycling sustain CO<sub>2</sub> fertilization effect on tree-ring growth**

---

In the format provided by the authors and unedited

## Supplementary Information

for

### Enhanced leaf turnover and nitrogen recycling sustain CO<sub>2</sub> fertilization effect on tree-ring growth

Ying Guo<sup>1,2#</sup>, Lin Zhang<sup>1#</sup>, Liu Yang<sup>1,2</sup>, Wei Shen<sup>1</sup>, Yude Pan<sup>3</sup>, Ian J. Wright<sup>4,5</sup>, Yiqi Luo<sup>6</sup>,  
Tianxiang Luo<sup>1\*</sup>

<sup>1</sup>Institute of Tibetan Plateau Research, Chinese Academy of Sciences, Beijing 100101, China

<sup>2</sup>University of Chinese Academy of Sciences, Beijing 100049, China

<sup>3</sup>USDA Forest Service, Northern Research Station, Durham, NH 03820, United States of America

<sup>4</sup>Hawkesbury Institute for the Environment, Western Sydney University, Locked Bag 1797, Penrith, NSW 2751, Australia

<sup>5</sup>Department of Biological Sciences, Macquarie University, North Ryde, NSW 2109, Australia

<sup>6</sup>Center for Ecosystem Science and Society, Department of Biological Sciences, Northern Arizona University, Flagstaff, AZ, United States of America

#The same contributors

\*Corresponding Author:

Dr. Tianxiang Luo, Professor in ecology and biogeography

Institute of Tibetan Plateau Research, Chinese Academy of Sciences

Building 3, Courtyard 16, Lin Cui Road, Chaoyang District, Beijing 100101, China

Phone/Fax: +86 10 84097060; Email: luotx@itpcas.ac.cn

#### List of Supplementary Information:

Supplementary Figures 1-3

Supplementary Tables 1-6

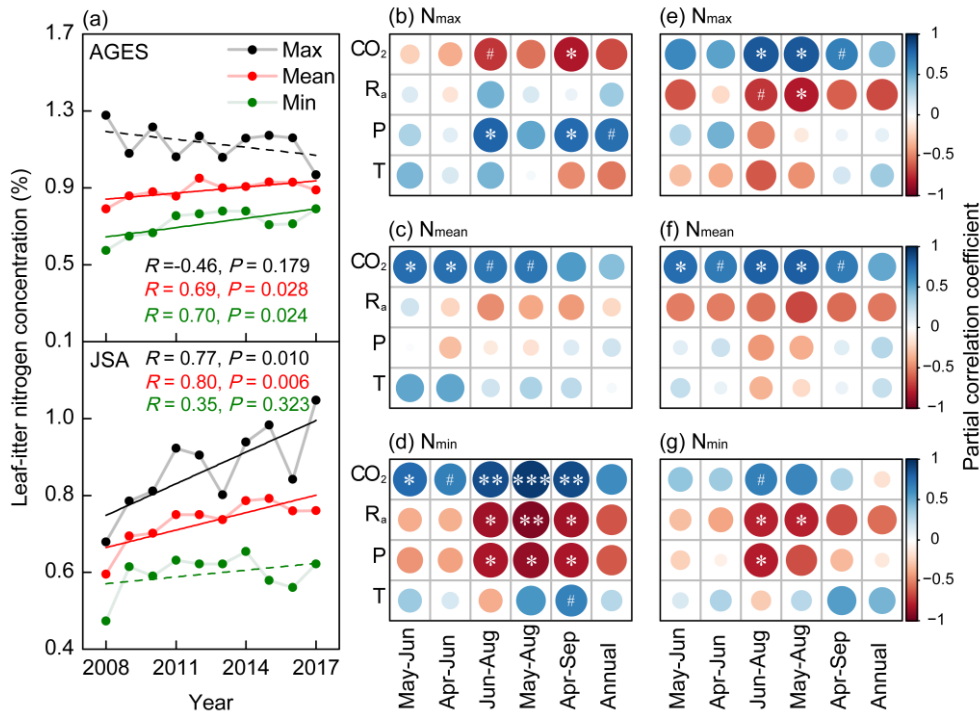

**Supplementary Figure 1.** Relative importance of climatic factors and atmospheric CO<sub>2</sub> concentration in determining interannual variations of leaf-litter nitrogen concentrations at two alpine treelines in the Sergyemla Mountains during 2007–2017. **(a)** Simple linear model was used for testing the variation trends in annual maximum (N<sub>max</sub>, black solid circles), mean (N<sub>mean</sub>, red solid circles) and minimum (N<sub>min</sub>, green solid circles) leaf-litter nitrogen concentrations for *A. georgei* var. *smithii* (AGES) and *J. saltuaria* (JSA). **(b-g)** Partial correlation coefficients of multiple linear regressions for relationships of N<sub>max</sub>, N<sub>mean</sub> and N<sub>min</sub> to observed seasonal/annual mean minimum temperature (T), precipitation (P) and solar radiation (R<sub>a</sub>), and atmospheric CO<sub>2</sub> concentration (CO<sub>2</sub>) at *A. georgei* var. *smithii* (b-d) and *J. saltuaria* (e-g) treelines, respectively. The significance of correlation coefficient is estimated by two-tailed t-test with no adjustment for multiple comparisons. Significant level: #  $P < 0.10$ , \*  $P < 0.05$ , \*\*  $P < 0.01$ , \*\*\*  $P < 0.001$ . The exact  $P$  values are found in Supplementary Table 3.

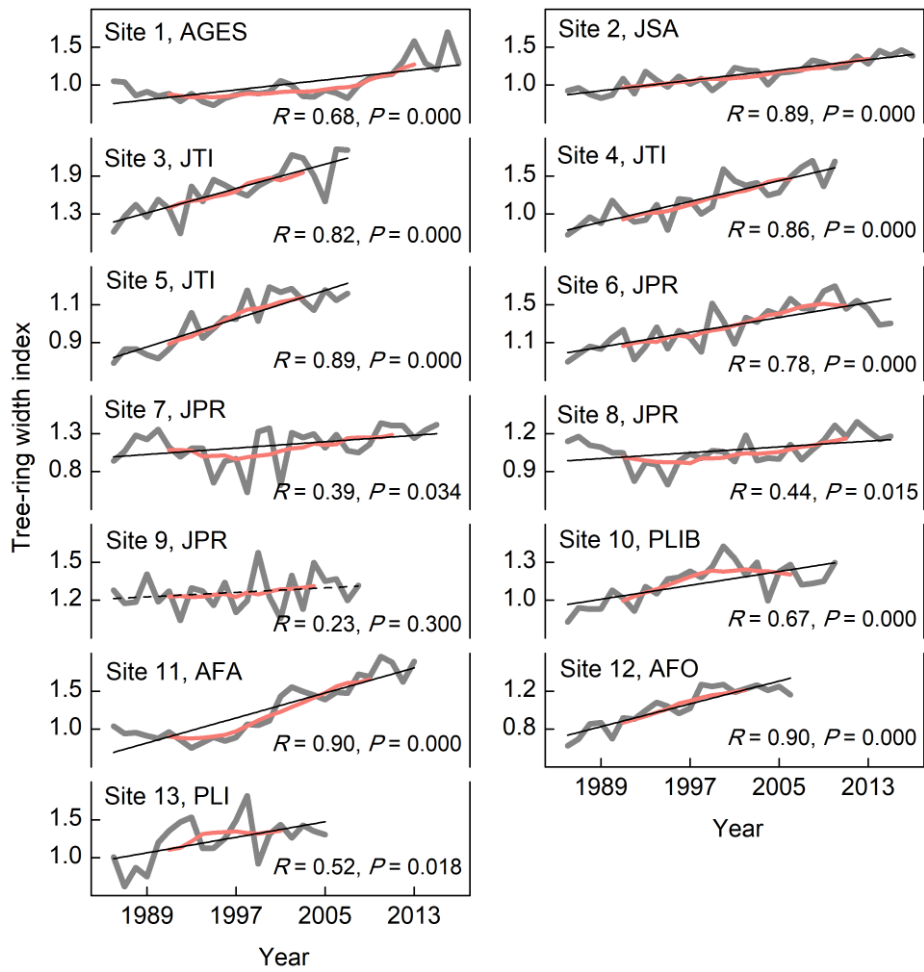

**Supplementary Figure 2.** Interannual trends in tree-ring width index (since 1986, thick gray lines) and their 10-year moving averages (thick red lines) across 8 tree species and 13 treeline sites on the Tibetan Plateau. The data were collected from this study (Sites 1-2) and the literature (Sites 3-13). The interannual trends were tested using simple linear model. The significance of correlation coefficient is estimated by two-tailed t-test with no adjustment for multiple comparisons.

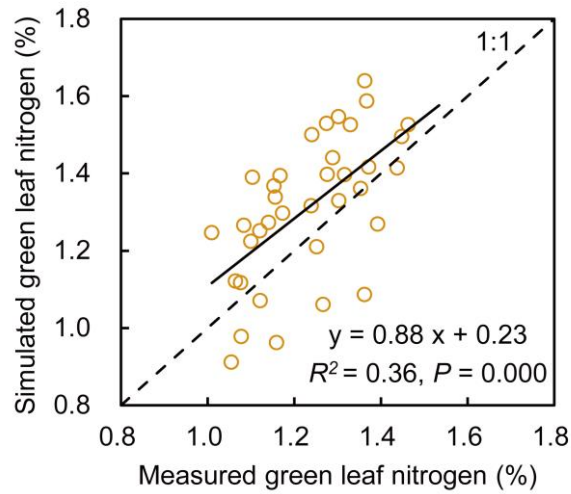

**Supplementary Figure 3.** Relationship between seasonal measurements of green leaf nitrogen concentration ( $N_{\text{green}}$ ) and the estimated  $N_{\text{green}}$  from leaf-litter nitrogen concentration ( $N_{\text{litter}}$ ) at *A. georgei* var. *smithii* treeline in the Sergyemla Mountains, using a global empirical model ( $N_{\text{green}} = (N_{\text{litter}} / \text{MLCF}) / 0.60$ , MLCF is the mass loss correction factor, 0.745 for conifers used here)<sup>46,47</sup>. The relationship was tested using simple linear model. The significance of the regression equation is estimated using the F-test. The 1:1 dashed line indicates the one-to-one relationship.

1 **Supplementary Table 1.** Description of 13 treeline sites on the Tibetan Plateau collected from this study and the literature.

| ID | Sites               | Species                                              | Abbr. | Latitude | Longitude | Altitude (m) | Duration  | Data source              |
|----|---------------------|------------------------------------------------------|-------|----------|-----------|--------------|-----------|--------------------------|
| 1  | Nyingchi, Tibet     | <i>Abies georgei</i> var.<br><i>smithii</i>          | AGES  | 29.60    | 94.61     | 4320         | 1986–2017 | This study               |
| 2  | Nyingchi, Tibet     | <i>Juniperus saltuaria</i>                           | JSA   | 29.61    | 94.60     | 4425         | 1986–2017 | This study               |
| 3  | Xiangcheng, Sichuan | <i>Juniperus tibetica</i>                            | JTI   | 28.90    | 99.75     | 3980         | 1986–2007 | [1] Li et al. (2011)     |
| 4  | Qamdo, Tibet        | <i>Juniperus tibetica</i>                            | JTI   | 31.15    | 97.17     | 4350–4500    | 1986–2010 | [2] Wang et al. (2014)   |
| 5  | Deqin, Yunnan       | <i>Juniperus tibetica</i>                            | JTI   | 28.37    | 99.03     | 4260         | 1986–2007 | [3] Wright et al. (2011) |
| 6  | Wulan, Qinghai      | <i>Juniperus przewalskii</i>                         | JPR   | 37.05    | 98.67     | 3972         | 1986–2015 | [4] Song et al. (2018)   |
| 7  | Dulan, Qinghai      | <i>Juniperus przewalskii</i>                         | JPR   | 36.03    | 98.19     | 4024         | 1986–2015 | [4] Song et al. (2018)   |
| 8  | Tongde, Qinghai     | <i>Juniperus przewalskii</i>                         | JPR   | 34.76    | 100.79    | 3791         | 1986–2015 | [4] Song et al. (2018)   |
| 9  | Qilian, Qinghai     | <i>Juniperus przewalskii</i>                         | JPR   | 38.20    | 99.87     | 3300–3500    | 1986–2008 | [5] Yang et al. (2014)   |
| 10 | Basu, Tibet         | <i>Picea likiangensis</i> var.<br><i>balfouriana</i> | PLIB  | 30.13    | 97.36     | 4630–4766    | 1986–2010 | [6] Liu et al. (2015)    |
| 11 | Songpan, Sichuan    | <i>Abies faxoniana</i>                               | AFA   | 33.05    | 103.72    | 3620         | 1986–2013 | [7] Guo et al. (2019)    |
| 12 | Daocheng, Sichuan   | <i>Abies forrestii</i>                               | AFO   | 29.28    | 100.08    | 4150         | 1986–2006 | [8] Li et al. (2011)     |
| 13 | Shangri-La, Yunnan  | <i>Picea likiangensis</i>                            | PLI   | 27.58    | 99.35     | 3240         | 1986–2005 | [9] Fan (2013)           |

2

**Supplementary Table 2.** Pearson correlation coefficients of annual litterfall and its associated nitrogen resorption and return collected in different periods (previous year's month to current year's month) to tree-ring width index (n=10) and annual stem increment (n=8 for *A. georgei* var. *smithii*, n=9 for *J. saltuaria*) at treelines in the Sergyemla Mountains during 2007–2017. The significance of correlation coefficient is estimated by two-tailed t-test with no adjustment for multiple comparisons. *P* values are shown in parentheses. Significant level: #*P*<0.10, \**P*<0.05.

| Period                               | Tree-ring width index                    |                       | Annual stem increment                    |                       |
|--------------------------------------|------------------------------------------|-----------------------|------------------------------------------|-----------------------|
|                                      | <i>A. georgei</i><br>var. <i>smithii</i> | <i>J. saltuaria</i>   | <i>A. georgei</i><br>var. <i>smithii</i> | <i>J. saltuaria</i>   |
| Litterfall as independent variable   |                                          |                       |                                          |                       |
| Pre-May 15 to May 15                 | /                                        | <b>0.838* (0.002)</b> | /                                        | <b>0.784* (0.012)</b> |
| Pre-Jun 15 to Jun 15                 | <b>0.730* (0.017)</b>                    | <b>0.697* (0.025)</b> | <b>0.857* (0.007)</b>                    | <b>0.720* (0.029)</b> |
| Pre-Jul 15 to Jul 15                 | <b>0.707* (0.022)</b>                    | <b>0.666* (0.036)</b> | <b>0.878* (0.004)</b>                    | <b>0.729* (0.026)</b> |
| Pre-Aug 15 to Aug 15                 | <b>0.578# (0.080)</b>                    | 0.181 (0.617)         | <b>0.864* (0.006)</b>                    | 0.152 (0.697)         |
| Pre-Sep 15 to Sep 15                 | 0.574 (0.102)                            | −0.006 (0.988)        | <b>0.828* (0.011)</b>                    | −0.008 (0.984)        |
| Pre-Oct 15 to Oct 15                 | −0.043 (0.906)                           | 0.072 (0.843)         | 0.012 (0.978)                            | 0.119 (0.761)         |
| N resorption as independent variable |                                          |                       |                                          |                       |
| Pre-May 15 to May 15                 | /                                        | <b>0.852* (0.002)</b> | /                                        | <b>0.788* (0.012)</b> |
| Pre-Jun 15 to Jun 15                 | <b>0.760* (0.011)</b>                    | <b>0.706* (0.023)</b> | <b>0.864* (0.006)</b>                    | <b>0.747* (0.021)</b> |
| Pre-Jul 15 to Jul 15                 | <b>0.732* (0.016)</b>                    | <b>0.685* (0.029)</b> | <b>0.873* (0.005)</b>                    | <b>0.770* (0.015)</b> |
| Pre-Aug 15 to Aug 15                 | <b>0.571# (0.085)</b>                    | 0.172 (0.635)         | <b>0.856* (0.007)</b>                    | 0.169 (0.663)         |
| Pre-Sep 15 to Sep 15                 | 0.524 (0.120)                            | 0.023 (0.949)         | <b>0.806* (0.016)</b>                    | 0.022 (0.956)         |
| Pre-Oct 15 to Oct 15                 | 0.044 (0.904)                            | 0.102 (0.779)         | 0.151 (0.721)                            | 0.149 (0.701)         |
| N return as independent variable     |                                          |                       |                                          |                       |
| Pre-May 15 to May 15                 | /                                        | <b>0.852* (0.002)</b> | /                                        | <b>0.788* (0.012)</b> |
| Pre-Jun 15 to Jun 15                 | <b>0.760* (0.011)</b>                    | <b>0.706* (0.023)</b> | <b>0.864* (0.006)</b>                    | <b>0.747* (0.021)</b> |
| Pre-Jul 15 to Jul 15                 | <b>0.732* (0.016)</b>                    | <b>0.685* (0.029)</b> | <b>0.873* (0.005)</b>                    | <b>0.770* (0.015)</b> |
| Pre-Aug 15 to Aug 15                 | <b>0.571# (0.085)</b>                    | 0.172 (0.635)         | <b>0.856* (0.007)</b>                    | 0.169 (0.663)         |
| Pre-Sep 15 to Sep 15                 | 0.524 (0.120)                            | 0.023 (0.949)         | <b>0.806* (0.016)</b>                    | 0.022 (0.956)         |
| Pre-Oct 15 to Oct 15                 | 0.044 (0.904)                            | 0.102 (0.779)         | 0.151 (0.721)                            | 0.149 (0.701)         |

**Supplementary Table 3.** Partial correlation coefficients of multiple linear regressions for relationships of annual litterfall, annual nitrogen resorption (N-res) and return (N-ret), annual maximum ( $N_{\max}$ ), mean ( $N_{\text{mean}}$ ) and minimum ( $N_{\min}$ ) leaf-litter nitrogen concentrations, and tree-ring width index (TRWI) to current year's seasonal/annual mean minimum temperature (T), precipitation (P), solar radiation ( $R_a$ ) and atmospheric  $\text{CO}_2$  concentration ( $\text{CO}_2$ ) (Model 1), or to previous year's seasonal/annual mean minimum temperature (PT), precipitation (PP), solar radiation ( $\text{PR}_a$ ) and atmospheric  $\text{CO}_2$  concentration ( $\text{PCO}_2$ ) (Model 2) at *A. georgei* var. *smithii* and *J. saltuaria* treelines in the Sergyemla Mountains during 2007–2017. The statistical significance is estimated by two-tailed t-test with no adjustment for multiple comparisons. *P* values are shown in parentheses. Significant level: # $P < 0.10$ , \* $P < 0.05$ .

| Seasons                                                                   | Model 1          |                  |                  |                                | Model 2                         |                  |                                 |                                |
|---------------------------------------------------------------------------|------------------|------------------|------------------|--------------------------------|---------------------------------|------------------|---------------------------------|--------------------------------|
|                                                                           | T                | P                | $R_a$            | $\text{CO}_2$                  | PT                              | PP               | $\text{PR}_a$                   | $\text{PCO}_2$                 |
| Litterfall of <i>A. georgei</i> var. <i>smithii</i> as dependent variable |                  |                  |                  |                                |                                 |                  |                                 |                                |
| May-Jun                                                                   | 0.49<br>(0.263)  | -0.19<br>(0.688) | 0.35<br>(0.448)  | <b>0.84*</b><br><b>(0.018)</b> | 0.23<br>(0.616)                 | -0.10<br>(0.836) | -0.23<br>(0.626)                | <b>0.73#</b><br><b>(0.065)</b> |
| Apr-June                                                                  | 0.18<br>(0.703)  | -0.23<br>(0.615) | -0.16<br>(0.736) | <b>0.74#</b><br><b>(0.056)</b> | -0.45<br>(0.314)                | 0.15<br>(0.749)  | -0.23<br>(0.626)                | <b>0.73#</b><br><b>(0.065)</b> |
| Jun-Aug                                                                   | 0.03<br>(0.942)  | 0.28<br>(0.550)  | 0.23<br>(0.618)  | <b>0.75#</b><br><b>(0.051)</b> | <b>-0.83*</b><br><b>(0.020)</b> | -0.56<br>(0.187) | <b>-0.88*</b><br><b>(0.009)</b> | <b>0.93*</b><br><b>(0.002)</b> |
| May-Aug                                                                   | -0.17<br>(0.714) | -0.03<br>(0.955) | 0.25<br>(0.587)  | <b>0.72#</b><br><b>(0.068)</b> | -0.54<br>(0.211)                | 0.05<br>(0.913)  | <b>-0.77*</b><br><b>(0.044)</b> | <b>0.83*</b><br><b>(0.021)</b> |
| Apr-Sep                                                                   | -0.57<br>(0.178) | 0.38<br>(0.401)  | 0.20<br>(0.669)  | <b>0.69#</b><br><b>(0.083)</b> | <b>-0.79*</b><br><b>(0.035)</b> | 0.05<br>(0.923)  | <b>-0.86*</b><br><b>(0.013)</b> | <b>0.81*</b><br><b>(0.026)</b> |
| Annual                                                                    | -0.40<br>(0.380) | 0.37<br>(0.416)  | 0.29<br>(0.531)  | <b>0.72#</b><br><b>(0.066)</b> | -0.61<br>(0.145)                | 0.08<br>(0.865)  | <b>-0.72#</b><br><b>(0.066)</b> | <b>0.78*</b><br><b>(0.038)</b> |
| N-res of <i>A. georgei</i> var. <i>smithii</i> as dependent variable      |                  |                  |                  |                                |                                 |                  |                                 |                                |
| May-Jun                                                                   | 0.53<br>(0.222)  | -0.04<br>(0.935) | 0.24<br>(0.610)  | <b>0.86*</b><br><b>(0.014)</b> | 0.42<br>(0.349)                 | -0.09<br>(0.844) | -0.23<br>(0.625)                | <b>0.77*</b><br><b>(0.042)</b> |



|          |         |         |         |                |         |         |                |                |
|----------|---------|---------|---------|----------------|---------|---------|----------------|----------------|
| Apr-June | 0.39    | -0.26   | -0.32   | <b>0.81*</b>   | -0.24   | 0.05    | -0.28          | <b>0.71#</b>   |
|          | (0.389) | (0.573) | (0.478) | <b>(0.028)</b> | (0.604) | (0.916) | (0.550)        | <b>(0.075)</b> |
| Jun-Aug  | 0.02    | 0.15    | 0.20    | <b>0.78*</b>   | -0.66   | -0.37   | <b>-0.83*</b>  | <b>0.91*</b>   |
|          | (0.970) | (0.740) | (0.671) | <b>(0.039)</b> | (0.105) | (0.413) | <b>(0.022)</b> | <b>(0.005)</b> |
| May-Aug  | -0.13   | -0.06   | 0.23    | <b>0.76*</b>   | -0.35   | 0.18    | <b>-0.80*</b>  | <b>0.87*</b>   |
|          | (0.786) | (0.895) | (0.614) | <b>(0.048)</b> | (0.440) | (0.704) | <b>(0.032)</b> | <b>(0.011)</b> |
| Apr-Sep  | -0.47   | 0.37    | 0.16    | <b>0.72#</b>   | -0.59   | -0.15   | <b>-0.87*</b>  | <b>0.82*</b>   |
|          | (0.289) | (0.407) | (0.731) | <b>(0.071)</b> | (0.160) | (0.743) | <b>(0.011)</b> | <b>(0.023)</b> |
| Annual   | -0.31   | 0.40    | 0.25    | <b>0.73#</b>   | -0.29   | -0.29   | <b>-0.80*</b>  | <b>0.76*</b>   |
|          | (0.505) | (0.375) | (0.585) | <b>(0.062)</b> | (0.530) | (0.535) | <b>(0.031)</b> | <b>(0.045)</b> |

---

N-ret of *A. georgei* var. *smithii* as dependent variable

|          |         |         |         |                |         |         |                |                |
|----------|---------|---------|---------|----------------|---------|---------|----------------|----------------|
| May-Jun  | 0.53    | -0.04   | 0.24    | <b>0.86*</b>   | 0.42    | -0.09   | -0.23          | <b>0.77*</b>   |
|          | (0.222) | (0.935) | (0.610) | <b>(0.014)</b> | (0.349) | (0.844) | (0.625)        | <b>(0.042)</b> |
| Apr-June | 0.39    | -0.26   | -0.32   | <b>0.81*</b>   | -0.24   | 0.05    | -0.28          | <b>0.71#</b>   |
|          | (0.389) | (0.573) | (0.478) | <b>(0.028)</b> | (0.604) | (0.916) | (0.550)        | <b>(0.075)</b> |
| Jun-Aug  | 0.02    | 0.15    | 0.20    | <b>0.78*</b>   | -0.66   | -0.37   | <b>-0.83*</b>  | <b>0.91*</b>   |
|          | (0.970) | (0.740) | (0.672) | <b>(0.039)</b> | (0.105) | (0.413) | <b>(0.022)</b> | <b>(0.005)</b> |
| May-Aug  | -0.13   | -0.06   | 0.23    | <b>0.76*</b>   | -0.35   | 0.18    | <b>-0.80*</b>  | <b>0.87*</b>   |
|          | (0.787) | (0.895) | (0.614) | <b>(0.048)</b> | (0.440) | (0.705) | <b>(0.032)</b> | <b>(0.011)</b> |
| Apr-Sep  | -0.47   | 0.37    | 0.16    | <b>0.72#</b>   | -0.59   | -0.15   | <b>-0.87*</b>  | <b>0.82*</b>   |
|          | (0.289) | (0.407) | (0.731) | <b>(0.071)</b> | (0.160) | (0.743) | <b>(0.011)</b> | <b>(0.023)</b> |
| Annual   | -0.31   | 0.40    | 0.25    | <b>0.73#</b>   | -0.29   | -0.29   | <b>-0.80*</b>  | <b>0.76*</b>   |
|          | (0.505) | (0.375) | (0.585) | <b>(0.062)</b> | (0.530) | (0.534) | <b>(0.031)</b> | <b>(0.045)</b> |

---

N<sub>max</sub> of *A. georgei* var. *smithii* as dependent variable

|          |         |         |         |         |         |         |         |         |
|----------|---------|---------|---------|---------|---------|---------|---------|---------|
| May-Jun  | 0.46    | 0.32    | 0.15    | -0.23   | -0.28   | -0.10   | -0.37   | -0.54   |
|          | (0.301) | (0.490) | (0.741) | (0.618) | (0.542) | (0.833) | (0.420) | (0.210) |
| Apr-June | 0.17    | 0.13    | -0.14   | -0.37   | -0.61   | 0.32    | -0.27   | -0.60   |
|          | (0.721) | (0.782) | (0.760) | (0.416) | (0.147) | (0.486) | (0.554) | (0.158) |

|                                                                                  |         |                |                |                |                |                |                |                |
|----------------------------------------------------------------------------------|---------|----------------|----------------|----------------|----------------|----------------|----------------|----------------|
| Jun-Aug                                                                          | 0.47    | <b>0.80*</b>   | 0.48           | <b>-0.72#</b>  | <b>-0.70#</b>  | -0.64          | -0.55          | -0.55          |
|                                                                                  | (0.289) | <b>(0.031)</b> | (0.276)        | <b>(0.069)</b> | <b>(0.077)</b> | (0.123)        | (0.204)        | (0.202)        |
| May-Aug                                                                          | 0.04    | 0.53           | 0.16           | -0.55          | -0.49          | -0.31          | -0.40          | -0.63          |
|                                                                                  | (0.932) | (0.223)        | (0.727)        | (0.205)        | (0.266)        | (0.502)        | (0.374)        | (0.133)        |
| Apr-Sep                                                                          | -0.47   | <b>0.78*</b>   | 0.08           | <b>-0.81*</b>  | -0.53          | -0.18          | -0.32          | -0.61          |
|                                                                                  | (0.284) | <b>(0.039)</b> | (0.863)        | <b>(0.028)</b> | (0.221)        | (0.697)        | (0.491)        | (0.148)        |
| Annual                                                                           | -0.52   | <b>0.75#</b>   | 0.37           | -0.65          | 0.00           | -0.09          | -0.35          | -0.56          |
|                                                                                  | (0.229) | <b>(0.052)</b> | (0.414)        | (0.112)        | (0.993)        | (0.844)        | (0.439)        | (0.187)        |
| <hr/>                                                                            |         |                |                |                |                |                |                |                |
| N <sub>mean</sub> of <i>A. georgei</i> var. <i>smithii</i> as dependent variable |         |                |                |                |                |                |                |                |
| May-Jun                                                                          | 0.52    | 0.02           | 0.20           | <b>0.76*</b>   | 0.57           | -0.48          | <b>-0.70#</b>  | <b>0.75#</b>   |
|                                                                                  | (0.231) | (0.966)        | (0.665)        | <b>(0.046)</b> | (0.177)        | (0.270)        | <b>(0.080)</b> | <b>(0.051)</b> |
| Apr-June                                                                         | 0.52    | -0.31          | -0.21          | <b>0.76*</b>   | 0.61           | <b>-0.74#</b>  | <b>-0.81*</b>  | 0.53           |
|                                                                                  | (0.229) | (0.499)        | (0.647)        | <b>(0.049)</b> | (0.142)        | <b>(0.059)</b> | <b>(0.027)</b> | (0.218)        |
| Jun-Aug                                                                          | 0.20    | -0.12          | -0.47          | <b>0.72#</b>   | -0.24          | -0.32          | -0.36          | <b>0.69#</b>   |
|                                                                                  | (0.661) | (0.804)        | (0.292)        | <b>(0.067)</b> | (0.605)        | (0.488)        | (0.423)        | <b>(0.088)</b> |
| May-Aug                                                                          | 0.31    | -0.15          | -0.38          | <b>0.72#</b>   | -0.15          | -0.34          | -0.65          | <b>0.70#</b>   |
|                                                                                  | (0.493) | (0.744)        | (0.396)        | <b>(0.066)</b> | (0.754)        | (0.449)        | (0.113)        | <b>(0.079)</b> |
| Apr-Sep                                                                          | 0.27    | 0.15           | -0.43          | 0.57           | 0.15           | <b>-0.73#</b>  | <b>-0.67#</b>  | <b>0.74#</b>   |
|                                                                                  | (0.562) | (0.752)        | (0.341)        | (0.184)        | (0.747)        | <b>(0.064)</b> | <b>(0.096)</b> | <b>(0.058)</b> |
| Annual                                                                           | 0.05    | 0.21           | -0.21          | 0.43           | 0.31           | <b>-0.82*</b>  | <b>-0.73#</b>  | 0.65           |
|                                                                                  | (0.917) | (0.657)        | (0.657)        | (0.340)        | (0.502)        | <b>(0.025)</b> | <b>(0.063)</b> | (0.112)        |
| <hr/>                                                                            |         |                |                |                |                |                |                |                |
| N <sub>min</sub> of <i>A. georgei</i> var. <i>smithii</i> as dependent variable  |         |                |                |                |                |                |                |                |
| May-Jun                                                                          | 0.37    | -0.44          | -0.36          | <b>0.77*</b>   | 0.48           | -0.12          | -0.05          | <b>0.69#</b>   |
|                                                                                  | (0.419) | (0.318)        | (0.422)        | <b>(0.041)</b> | (0.278)        | (0.795)        | (0.911)        | <b>(0.089)</b> |
| Apr-June                                                                         | 0.18    | -0.40          | -0.35          | <b>0.68#</b>   | <b>0.88*</b>   | <b>-0.76*</b>  | -0.50          | <b>0.80*</b>   |
|                                                                                  | (0.700) | (0.371)        | (0.440)        | <b>(0.091)</b> | <b>(0.009)</b> | <b>(0.046)</b> | (0.256)        | <b>(0.030)</b> |
| Jun-Aug                                                                          | -0.37   | <b>-0.82*</b>  | <b>-0.84*</b>  | <b>0.89*</b>   | 0.40           | -0.30          | -0.14          | <b>0.79*</b>   |
|                                                                                  | (0.418) | <b>(0.025)</b> | <b>(0.017)</b> | <b>(0.008)</b> | (0.372)        | (0.518)        | (0.773)        | <b>(0.036)</b> |

|         |         |         |         |         |         |         |         |         |
|---------|---------|---------|---------|---------|---------|---------|---------|---------|
| May-Aug | 0.58    | -0.87*  | -0.93*  | 0.95*   | 0.52    | -0.35   | -0.18   | 0.80*   |
|         | (0.171) | (0.010) | (0.003) | (0.001) | (0.237) | (0.446) | (0.695) | (0.032) |
| Apr-Sep | 0.68#   | -0.81*  | -0.83*  | 0.89*   | 0.72#   | -0.50   | -0.11   | 0.82*   |
|         | (0.094) | (0.026) | (0.020) | (0.007) | (0.067) | (0.249) | (0.810) | (0.023) |
| Annual  | 0.29    | -0.61   | -0.62   | 0.62    | 0.21    | -0.39   | -0.03   | 0.66    |
|         | (0.533) | (0.145) | (0.136) | (0.135) | (0.653) | (0.383) | (0.954) | (0.110) |

---

TRWI of *A. georgei* var. *smithii* as dependent variable

|          |         |         |         |         |         |         |         |         |
|----------|---------|---------|---------|---------|---------|---------|---------|---------|
| May-Jun  | 0.59    | -0.56   | 0.54    | 0.90*   | 0.10    | 0.02    | 0.02    | 0.70#   |
|          | (0.120) | (0.148) | (0.163) | (0.003) | (0.807) | (0.954) | (0.963) | (0.052) |
| Apr-June | 0.67#   | -0.75*  | 0.15    | 0.90*   | 0.16    | -0.04   | 0.03    | 0.64#   |
|          | (0.071) | (0.033) | (0.731) | (0.002) | (0.705) | (0.918) | (0.939) | (0.086) |
| Jun-Aug  | 0.41    | -0.30   | 0.17    | 0.85*   | -0.32   | 0.09    | -0.57   | 0.74*   |
|          | (0.314) | (0.468) | (0.690) | (0.007) | (0.433) | (0.825) | (0.143) | (0.035) |
| May-Aug  | 0.56    | -0.71*  | 0.41    | 0.92*   | -0.22   | 0.18    | -0.51   | 0.72*   |
|          | (0.148) | (0.047) | (0.312) | (0.001) | (0.602) | (0.678) | (0.193) | (0.043) |
| Apr-Sep  | 0.21    | -0.43   | 0.18    | 0.81*   | 0.00    | 0.20    | -0.36   | 0.56    |
|          | (0.624) | (0.285) | (0.664) | (0.015) | (0.999) | (0.640) | (0.385) | (0.149) |
| Annual   | -0.17   | -0.26   | 0.36    | 0.79*   | -0.43   | 0.18    | -0.01   | 0.70#   |
|          | (0.690) | (0.536) | (0.377) | (0.019) | (0.282) | (0.676) | (0.990) | (0.051) |

---

Litterfall of *Juniperus saltuaria* as dependent variable

|          |         |         |         |         |         |         |         |         |
|----------|---------|---------|---------|---------|---------|---------|---------|---------|
| May-Jun  | 0.10    | -0.63   | 0.54    | 0.70#   | 0.27    | 0.43    | 0.02    | 0.47    |
|          | (0.830) | (0.127) | (0.213) | (0.078) | (0.551) | (0.336) | (0.961) | (0.281) |
| Apr-June | -0.34   | -0.50   | 0.25    | 0.52    | -0.60   | 0.54    | 0.37    | 0.48    |
|          | (0.452) | (0.256) | (0.594) | (0.230) | (0.155) | (0.212) | (0.409) | (0.275) |
| Jun-Aug  | 0.21    | 0.22    | 0.38    | 0.50    | -0.46   | 0.15    | -0.44   | 0.54    |
|          | (0.658) | (0.639) | (0.394) | (0.258) | (0.305) | (0.745) | (0.321) | (0.215) |
| May-Aug  | -0.07   | -0.23   | 0.31    | 0.57    | -0.12   | 0.47    | -0.14   | 0.43    |
|          | (0.881) | (0.619) | (0.495) | (0.185) | (0.797) | (0.288) | (0.773) | (0.340) |

|                                                           |         |         |         |                |                |         |         |                |
|-----------------------------------------------------------|---------|---------|---------|----------------|----------------|---------|---------|----------------|
| Apr-Sep                                                   | -0.61   | -0.59   | 0.40    | <b>0.74#</b>   | -0.64          | 0.61    | -0.32   | 0.15           |
|                                                           | (0.143) | (0.165) | (0.373) | <b>(0.056)</b> | (0.121)        | (0.145) | (0.489) | (0.742)        |
| Annual                                                    | -0.46   | -0.63   | 0.40    | <b>0.74#</b>   | <b>-0.72#</b>  | 0.56    | 0.05    | 0.50           |
|                                                           | (0.299) | (0.129) | (0.378) | <b>(0.056)</b> | <b>(0.069)</b> | (0.191) | (0.916) | (0.252)        |
| <hr/>                                                     |         |         |         |                |                |         |         |                |
| N-res of <i>Juniperus saltuaria</i> as dependent variable |         |         |         |                |                |         |         |                |
| May-Jun                                                   | 0.12    | -0.62   | 0.40    | <b>0.81*</b>   | 0.55           | 0.54    | -0.06   | <b>0.74#</b>   |
|                                                           | (0.801) | (0.141) | (0.368) | <b>(0.026)</b> | (0.199)        | (0.211) | (0.897) | <b>(0.057)</b> |
| Apr-June                                                  | -0.14   | -0.46   | -0.02   | <b>0.71#</b>   | -0.42          | 0.45    | 0.19    | 0.66           |
|                                                           | (0.760) | (0.300) | (0.966) | <b>(0.074)</b> | (0.350)        | (0.314) | (0.678) | (0.105)        |
| Jun-Aug                                                   | 0.17    | 0.06    | 0.36    | <b>0.74#</b>   | -0.51          | 0.09    | -0.61   | <b>0.81*</b>   |
|                                                           | (0.718) | (0.894) | (0.422) | <b>(0.057)</b> | (0.241)        | (0.840) | (0.146) | <b>(0.029)</b> |
| May-Aug                                                   | -0.16   | -0.45   | 0.25    | <b>0.79*</b>   | -0.05          | 0.58    | -0.31   | <b>0.73#</b>   |
|                                                           | (0.733) | (0.309) | (0.582) | <b>(0.034)</b> | (0.917)        | (0.169) | (0.497) | <b>(0.061)</b> |
| Apr-Sep                                                   | -0.58   | -0.55   | 0.37    | <b>0.84*</b>   | -0.58          | 0.59    | -0.56   | 0.54           |
|                                                           | (0.170) | (0.201) | (0.407) | <b>(0.017)</b> | (0.175)        | (0.166) | (0.190) | (0.214)        |
| Annual                                                    | -0.31   | -0.48   | 0.32    | <b>0.78*</b>   | <b>-0.74#</b>  | 0.57    | -0.21   | <b>0.75#</b>   |
|                                                           | (0.506) | (0.275) | (0.485) | <b>(0.038)</b> | <b>(0.055)</b> | (0.177) | (0.657) | <b>(0.051)</b> |

N-ret of *Juniperus saltuaria* as dependent variable

|          |         |         |         |                |         |         |         |                |
|----------|---------|---------|---------|----------------|---------|---------|---------|----------------|
| May-Jun  | 0.12    | -0.62   | 0.40    | <b>0.81*</b>   | 0.55    | 0.54    | -0.06   | <b>0.74#</b>   |
|          | (0.802) | (0.141) | (0.368) | <b>(0.026)</b> | (0.199) | (0.211) | (0.897) | <b>(0.057)</b> |
| Apr-June | -0.14   | -0.46   | -0.02   | <b>0.71#</b>   | -0.42   | 0.45    | 0.19    | 0.66           |
|          | (0.760) | (0.300) | (0.966) | <b>(0.075)</b> | (0.350) | (0.314) | (0.678) | (0.105)        |
| Jun-Aug  | 0.17    | 0.06    | 0.36    | <b>0.74#</b>   | -0.51   | 0.09    | -0.61   | <b>0.81*</b>   |
|          | (0.718) | (0.894) | (0.422) | <b>(0.057)</b> | (0.241) | (0.840) | (0.146) | <b>(0.029)</b> |
| May-Aug  | -0.16   | -0.45   | 0.25    | <b>0.79*</b>   | -0.05   | 0.58    | -0.31   | <b>0.73#</b>   |
|          | (0.733) | (0.310) | (0.582) | <b>(0.034)</b> | (0.918) | (0.169) | (0.497) | <b>(0.061)</b> |
| Apr-Sep  | -0.58   | -0.55   | 0.37    | <b>0.84*</b>   | -0.58   | 0.59    | -0.56   | 0.54           |
|          | (0.169) | (0.201) | (0.407) | <b>(0.017)</b> | (0.175) | (0.166) | (0.190) | (0.214)        |

|                                                                       |         |         |                |                |                |                |                |                |
|-----------------------------------------------------------------------|---------|---------|----------------|----------------|----------------|----------------|----------------|----------------|
| Annual                                                                | -0.31   | -0.48   | 0.32           | <b>0.78*</b>   | <b>-0.74#</b>  | 0.57           | -0.21          | <b>0.75#</b>   |
|                                                                       | (0.506) | (0.275) | (0.485)        | <b>(0.038)</b> | <b>(0.055)</b> | (0.177)        | (0.657)        | <b>(0.051)</b> |
| <hr/>                                                                 |         |         |                |                |                |                |                |                |
| N <sub>max</sub> of <i>Juniperus saltuaria</i> as dependent variable  |         |         |                |                |                |                |                |                |
| May-Jun                                                               | -0.30   | 0.29    | -0.63          | 0.65           | 0.23           | -0.39          | -0.19          | <b>0.82*</b>   |
|                                                                       | (0.510) | (0.528) | (0.130)        | (0.118)        | (0.621)        | (0.392)        | (0.683)        | <b>(0.024)</b> |
| Apr-June                                                              | -0.38   | 0.48    | -0.19          | 0.54           | <b>0.92*</b>   | <b>-0.87*</b>  | <b>-0.87*</b>  | <b>0.95*</b>   |
|                                                                       | (0.406) | (0.279) | (0.682)        | (0.212)        | <b>(0.004)</b> | <b>(0.011)</b> | <b>(0.012)</b> | <b>(0.001)</b> |
| Jun-Aug                                                               | -0.61   | -0.49   | <b>-0.71#</b>  | <b>0.84*</b>   | 0.41           | -0.31          | 0.38           | <b>0.89*</b>   |
|                                                                       | (0.143) | (0.261) | <b>(0.072)</b> | <b>(0.017)</b> | (0.361)        | (0.499)        | (0.403)        | <b>(0.008)</b> |
| May-Aug                                                               | -0.46   | -0.12   | <b>-0.79*</b>  | <b>0.85*</b>   | 0.30           | -0.50          | 0.10           | <b>0.88*</b>   |
|                                                                       | (0.303) | (0.799) | <b>(0.033)</b> | <b>(0.016)</b> | (0.510)        | (0.255)        | (0.824)        | <b>(0.010)</b> |
| Apr-Sep                                                               | 0.19    | 0.08    | -0.60          | <b>0.69#</b>   | 0.65           | <b>-0.70#</b>  | 0.18           | <b>0.92*</b>   |
|                                                                       | (0.689) | (0.861) | (0.157)        | <b>(0.087)</b> | (0.115)        | <b>(0.080)</b> | (0.707)        | <b>(0.003)</b> |
| Annual                                                                | 0.36    | 0.11    | -0.66          | 0.45           | 0.48           | -0.51          | -0.01          | <b>0.82*</b>   |
|                                                                       | (0.431) | (0.819) | (0.109)        | (0.313)        | (0.277)        | (0.244)        | (0.984)        | <b>(0.025)</b> |
| <hr/>                                                                 |         |         |                |                |                |                |                |                |
| N <sub>mean</sub> of <i>Juniperus saltuaria</i> as dependent variable |         |         |                |                |                |                |                |                |
| May-Jun                                                               | 0.24    | 0.13    | -0.52          | <b>0.76*</b>   | <b>0.74#</b>   | -0.18          | -0.47          | <b>0.88*</b>   |
|                                                                       | (0.602) | (0.788) | (0.232)        | <b>(0.047)</b> | <b>(0.055)</b> | (0.698)        | (0.283)        | <b>(0.009)</b> |
| Apr-June                                                              | 0.09    | 0.21    | -0.51          | <b>0.70#</b>   | <b>0.76*</b>   | -0.57          | <b>-0.74#</b>  | <b>0.85*</b>   |
|                                                                       | (0.845) | (0.645) | (0.241)        | <b>(0.080)</b> | <b>(0.049)</b> | (0.181)        | <b>(0.058)</b> | <b>(0.015)</b> |
| Jun-Aug                                                               | -0.34   | -0.44   | -0.54          | <b>0.81*</b>   | -0.07          | -0.52          | -0.45          | <b>0.85*</b>   |
|                                                                       | (0.450) | (0.325) | (0.208)        | <b>(0.026)</b> | (0.878)        | (0.235)        | (0.315)        | <b>(0.015)</b> |
| May-Aug                                                               | -0.19   | -0.37   | -0.66          | <b>0.83*</b>   | 0.22           | -0.32          | -0.48          | <b>0.83*</b>   |
|                                                                       | (0.680) | (0.415) | (0.104)        | <b>(0.021)</b> | (0.643)        | (0.481)        | (0.277)        | <b>(0.020)</b> |
| Apr-Sep                                                               | 0.09    | 0.13    | -0.56          | <b>0.70#</b>   | 0.46           | -0.51          | -0.53          | <b>0.81*</b>   |
|                                                                       | (0.851) | (0.775) | (0.188)        | <b>(0.077)</b> | (0.302)        | (0.247)        | (0.222)        | <b>(0.026)</b> |
| Annual                                                                | 0.24    | 0.29    | -0.53          | 0.52           | 0.16           | -0.32          | -0.30          | 0.66           |
|                                                                       | (0.609) | (0.531) | (0.223)        | (0.236)        | (0.731)        | (0.482)        | (0.512)        | (0.107)        |

N<sub>min</sub> of *Juniperus saltuaria* as dependent variable

|          |         |                |                |                |                |                |         |         |
|----------|---------|----------------|----------------|----------------|----------------|----------------|---------|---------|
| May-Jun  | 0.16    | -0.23          | -0.31          | 0.39           | 0.51           | -0.25          | 0.11    | 0.43    |
|          | (0.730) | (0.613)        | (0.503)        | (0.384)        | (0.245)        | (0.588)        | (0.808) | (0.334) |
| Apr-June | 0.30    | -0.08          | -0.40          | 0.35           | <b>0.80*</b>   | <b>-0.74#</b>  | -0.40   | 0.64    |
|          | (0.509) | (0.857)        | (0.375)        | (0.436)        | <b>(0.030)</b> | <b>(0.057)</b> | (0.368) | (0.120) |
| Jun-Aug  | -0.25   | <b>-0.78*</b>  | <b>-0.78*</b>  | <b>0.69#</b>   | 0.34           | -0.16          | 0.04    | 0.41    |
|          | (0.588) | <b>(0.038)</b> | <b>(0.041)</b> | <b>(0.087)</b> | (0.455)        | (0.732)        | (0.938) | (0.367) |
| May-Aug  | 0.27    | -0.65          | <b>-0.77*</b>  | 0.66           | 0.33           | -0.19          | -0.01   | 0.45    |
|          | (0.554) | (0.115)        | <b>(0.041)</b> | (0.108)        | (0.466)        | (0.681)        | (0.985) | (0.308) |
| Apr-Sep  | 0.56    | -0.33          | -0.64          | 0.32           | 0.45           | -0.34          | 0.02    | 0.51    |
|          | (0.193) | (0.471)        | (0.119)        | (0.484)        | (0.309)        | (0.460)        | (0.965) | (0.247) |
| Annual   | 0.47    | -0.12          | -0.56          | -0.16          | -0.16          | -0.20          | 0.31    | 0.48    |
|          | (0.289) | (0.796)        | (0.193)        | (0.735)        | (0.729)        | (0.659)        | (0.502) | (0.273) |

---

TRWI of *Juniperus saltuaria* as dependent variable

|          |         |                |         |                |                |         |         |                |
|----------|---------|----------------|---------|----------------|----------------|---------|---------|----------------|
| May-Jun  | 0.26    | -0.31          | 0.39    | <b>0.81*</b>   | -0.09          | -0.07   | -0.33   | <b>0.74*</b>   |
|          | (0.528) | (0.454)        | (0.334) | <b>(0.014)</b> | (0.829)        | (0.876) | (0.419) | <b>(0.037)</b> |
| Apr-June | -0.29   | -0.44          | 0.21    | <b>0.77*</b>   | -0.33          | 0.14    | -0.26   | <b>0.69#</b>   |
|          | (0.493) | (0.279)        | (0.621) | <b>(0.026)</b> | (0.426)        | (0.736) | (0.530) | <b>(0.060)</b> |
| Jun-Aug  | 0.58    | <b>0.68#</b>   | 0.34    | <b>0.75*</b>   | <b>-0.76*</b>  | -0.57   | -0.48   | <b>0.88*</b>   |
|          | (0.133) | <b>(0.066)</b> | (0.412) | <b>(0.032)</b> | <b>(0.029)</b> | (0.139) | (0.226) | <b>(0.004)</b> |
| May-Aug  | 0.31    | 0.36           | 0.01    | <b>0.74*</b>   | -0.60          | -0.41   | -0.36   | <b>0.79*</b>   |
|          | (0.457) | (0.378)        | (0.978) | <b>(0.036)</b> | (0.119)        | (0.313) | (0.382) | <b>(0.019)</b> |
| Apr-Sep  | -0.14   | -0.12          | -0.30   | <b>0.69#</b>   | <b>-0.66#</b>  | -0.20   | 0.04    | <b>0.77*</b>   |
|          | (0.748) | (0.769)        | (0.471) | <b>(0.060)</b> | <b>(0.074)</b> | (0.640) | (0.931) | <b>(0.026)</b> |
| Annual   | -0.13   | -0.39          | -0.21   | <b>0.64#</b>   | -0.58          | -0.05   | 0.12    | <b>0.76*</b>   |
|          | (0.754) | (0.341)        | (0.615) | <b>(0.088)</b> | (0.132)        | (0.905) | (0.773) | <b>(0.028)</b> |

---

**Supplementary Table 4.** Estimates of regression weights for structural equation models quantifying direct effects of climatic factors and atmospheric CO<sub>2</sub> and their indirect effects through interactions with litterfall and N-ret/N-res on tree-ring width index (TRWI) in *A. georgei* var. *smithii* and *J. saltuaria* treeline forests in the Sergyemla Mountains during 2007–2017.

| Paths                                                 | Estimate | Std. Error | Critical Ratio | P value |
|-------------------------------------------------------|----------|------------|----------------|---------|
| <i>A. georgei</i> var. <i>smithii</i> treeline forest |          |            |                |         |
| Litterfall <--- CO <sub>2</sub>                       | 2.356    | 0.786      | 2.998          | 0.003   |
| Litterfall <--- P                                     | – 0.011  | 0.060      | – 0.181        | 0.856   |
| Litterfall <--- T                                     | – 8.989  | 18.187     | – 0.494        | 0.621   |
| N-ret/res <--- CO <sub>2</sub>                        | 0.004    | 0.003      | 1.262          | 0.207   |
| N-ret/res <--- P                                      | 0.000    | 0.000      | – 0.371        | 0.710   |
| N-ret/res <--- T                                      | 0.019    | 0.048      | 0.387          | 0.699   |
| N-ret/res <--- Litterfall                             | 0.009    | 0.001      | 9.840          | 0.000   |
| TRWI <--- CO <sub>2</sub>                             | 0.013    | 0.005      | 2.808          | 0.005   |
| TRWI <--- P                                           | – 0.001  | 0.000      | – 5.090        | 0.000   |
| TRWI <--- T                                           | 0.196    | 0.072      | 2.713          | 0.007   |
| TRWI <--- N-ret/res                                   | 0.604    | 0.147      | 4.097          | 0.000   |
| <i>Juniperus saltuaria</i> treeline forest            |          |            |                |         |
| Litterfall <--- CO <sub>2</sub>                       | 2.495    | 1.272      | 1.961          | 0.050   |
| Litterfall <--- P                                     | – 0.127  | 0.115      | – 1.103        | 0.270   |
| Litterfall <--- T                                     | – 13.146 | 34.975     | – 0.376        | 0.707   |
| N-ret/res <--- CO <sub>2</sub>                        | 0.015    | 0.004      | 4.139          | 0.000   |
| N-ret/res <--- P                                      | – 0.001  | 0.000      | – 2.080        | 0.038   |
| N-ret/res <--- T                                      | – 0.052  | 0.081      | – 0.644        | 0.520   |
| N-ret/res <--- Litterfall                             | 0.005    | 0.001      | 6.876          | 0.000   |
| TRWI <--- CO <sub>2</sub>                             | – 0.002  | 0.003      | – 0.609        | 0.543   |
| TRWI <--- P                                           | 0.001    | 0.000      | 4.405          | 0.000   |
| TRWI <--- T                                           | 0.111    | 0.044      | 2.512          | 0.012   |
| TRWI <--- N-ret/res                                   | 0.328    | 0.072      | 4.566          | 0.000   |

**Supplementary Table 5.** Partial correlation coefficients of multiple linear regressions for relationships of tree-ring width index to previous and current year's monthly/seasonal mean minimum temperature (PT, T) and precipitation (PP, P) from May to August and the atmospheric CO<sub>2</sub> concentration, based on the chronological data (since 1986) of tree-ring width index across 8 tree species and 13 treeline sites on the Tibetan Plateau collected from this study and the literature. Detailed sites information is found in Supplementary Table 1. The statistical significance is estimated by two-tailed t-test with no adjustment for multiple comparisons. *P* values are shown in parentheses. Significant level: #*P* < 0.10, \**P* < 0.05.

| Site ID | Species                                     | Month                                | Partial correlation coefficient |                                   |                                   |                                 |                                 |
|---------|---------------------------------------------|--------------------------------------|---------------------------------|-----------------------------------|-----------------------------------|---------------------------------|---------------------------------|
|         |                                             |                                      | PT                              | PP                                | T                                 | P                               | CO <sub>2</sub>                 |
| 1       | <i>Abies georgei</i><br>var. <i>smithii</i> | May                                  | -0.144<br>(0.466)               | 0.005<br>(0.981)                  | - <b>0.486*</b><br><b>(0.009)</b> | -0.171<br>(0.383)               | <b>0.793*</b><br><b>(0.000)</b> |
|         |                                             | Jun                                  | 0.005<br>(0.980)                | 0.211<br>(0.282)                  | 0.141<br>(0.475)                  | 0.040<br>(0.842)                | <b>0.484*</b><br><b>(0.009)</b> |
|         | Jul                                         | - <b>0.369#</b><br><b>(0.053)</b>    | -0.063<br>(0.750)               | 0.150<br>(0.445)                  | -0.090<br>(0.647)                 | <b>0.656*</b><br><b>(0.000)</b> |                                 |
|         | Aug                                         | - <b>0.487*</b><br><b>(0.009)</b>    | <b>0.373#</b><br><b>(0.051)</b> | - <b>0.474*</b><br><b>(0.011)</b> | 0.025<br>(0.901)                  | <b>0.846*</b><br><b>(0.000)</b> |                                 |
|         | May-Jun                                     | -0.192<br>(0.327)                    | 0.137<br>(0.487)                | -0.295<br>(0.127)                 | -0.065<br>(0.742)                 | <b>0.709*</b><br><b>(0.000)</b> |                                 |
|         | Jun-Aug                                     | - <b>0.456*</b><br><b>(0.015)</b>    | 0.264<br>(0.174)                | -0.023<br>(0.909)                 | -0.128<br>(0.515)                 | <b>0.738*</b><br><b>(0.000)</b> |                                 |
|         | May-Aug                                     | - <b>0.502*</b><br><b>(0.006)</b>    | 0.262<br>(0.178)                | -0.189<br>(0.335)                 | -0.134<br>(0.497)                 | <b>0.785*</b><br><b>(0.000)</b> |                                 |
|         | 2                                           | <i>Juniperus</i><br><i>saltuaria</i> | May                             | -0.182<br>(0.354)                 | 0.062<br>(0.755)                  | -0.115<br>(0.561)               | -0.199<br>(0.310)               |
| Jun     |                                             |                                      | -0.316<br>(0.101)               | -0.099<br>(0.616)                 | -0.126<br>(0.522)                 | -0.078<br>(0.695)               | <b>0.840*</b><br><b>(0.000)</b> |



|   |                           |         |                |                |                |                |                |
|---|---------------------------|---------|----------------|----------------|----------------|----------------|----------------|
|   |                           | Jul     | - 0.341#       | 0.087          | 0.142          | 0.034          | <b>0.839*</b>  |
|   |                           |         | <b>(0.076)</b> | (0.660)        | (0.470)        | (0.864)        | <b>(0.001)</b> |
|   |                           | Aug     | - 0.410*       | - 0.036        | 0.051          | 0.132          | <b>0.888*</b>  |
|   |                           |         | <b>(0.030)</b> | (0.857)        | (0.795)        | (0.504)        | <b>(0.000)</b> |
|   |                           | May-Jun | - 0.251        | 0.002          | - 0.223        | - 0.049        | <b>0.846*</b>  |
|   |                           |         | (0.197)        | (0.991)        | (0.253)        | (0.803)        | <b>(0.000)</b> |
|   |                           | Jun-Aug | - 0.457*       | - 0.089        | 0.083          | 0.096          | <b>0.861*</b>  |
|   |                           |         | <b>(0.014)</b> | (0.651)        | (0.673)        | (0.626)        | <b>(0.000)</b> |
|   |                           | May-Aug | - 0.515*       | 0.004          | 0.065          | 0.007          | <b>0.860*</b>  |
|   |                           |         | <b>(0.005)</b> | (0.984)        | (0.742)        | (0.970)        | <b>(0.000)</b> |
| 3 | <i>Juniperus tibetica</i> | May     | - 0.041        | - 0.082        | 0.119          | 0.363          | <b>0.729*</b>  |
|   |                           |         | (0.872)        | (0.747)        | (0.638)        | (0.139)        | <b>(0.001)</b> |
|   |                           | Jun     | 0.062          | - 0.049        | - 0.195        | 0.300          | <b>0.722*</b>  |
|   |                           |         | (0.807)        | (0.848)        | (0.439)        | (0.227)        | <b>(0.001)</b> |
|   |                           | Jul     | - 0.035        | 0.001          | 0.179          | - 0.161        | <b>0.735*</b>  |
|   |                           |         | (0.889)        | (0.996)        | (0.476)        | (0.524)        | <b>(0.001)</b> |
|   |                           | Aug     | - 0.433#       | 0.193          | - 0.170        | - 0.061        | <b>0.770*</b>  |
|   |                           |         | <b>(0.073)</b> | (0.443)        | (0.500)        | (0.811)        | <b>(0.000)</b> |
|   |                           | May-Jun | 0.169          | - 0.283        | 0.028          | <b>0.407#</b>  | <b>0.706*</b>  |
|   |                           |         | (0.503)        | (0.256)        | (0.911)        | <b>(0.094)</b> | <b>(0.001)</b> |
|   |                           | Jun-Aug | - 0.333        | 0.215          | - 0.174        | - 0.156        | <b>0.728*</b>  |
|   |                           |         | (0.177)        | (0.392)        | (0.489)        | (0.537)        | <b>(0.001)</b> |
|   |                           | May-Aug | - 0.081        | - 0.032        | 0.171          | - 0.010        | <b>0.612*</b>  |
|   |                           |         | (0.749)        | (0.899)        | (0.497)        | (0.967)        | <b>(0.007)</b> |
| 4 | <i>Juniperus tibetica</i> | May     | 0.308          | <b>0.409#</b>  | - 0.535*       | 0.293          | <b>0.888*</b>  |
|   |                           |         | (0.174)        | <b>(0.066)</b> | <b>(0.013)</b> | (0.197)        | <b>(0.000)</b> |
|   |                           | Jun     | <b>0.418#</b>  | - 0.169        | - 0.492*       | - 0.105        | <b>0.904*</b>  |
|   |                           |         | <b>(0.059)</b> | (0.464)        | <b>(0.023)</b> | (0.651)        | <b>(0.000)</b> |

|   |                              |         |                |         |                |                |                |
|---|------------------------------|---------|----------------|---------|----------------|----------------|----------------|
|   |                              | Jul     | 0.319          | -0.058  | -0.190         | 0.216          | <b>0.807*</b>  |
|   |                              |         | (0.159)        | (0.803) | (0.409)        | (0.346)        | <b>(0.000)</b> |
|   |                              | Aug     | -0.222         | 0.233   | -0.006         | -0.198         | <b>0.735*</b>  |
|   |                              |         | (0.332)        | (0.310) | (0.978)        | (0.390)        | <b>(0.000)</b> |
|   |                              | May-Jun | <b>0.428#</b>  | 0.027   | <b>-0.589*</b> | -0.124         | <b>0.898*</b>  |
|   |                              |         | <b>(0.053)</b> | (0.908) | <b>(0.005)</b> | (0.594)        | <b>(0.000)</b> |
|   |                              | Jun-Aug | 0.340          | -0.188  | -0.364         | 0.085          | <b>0.783*</b>  |
|   |                              |         | (0.132)        | (0.414) | (0.105)        | (0.716)        | <b>(0.000)</b> |
|   |                              | May-Aug | 0.344          | -0.126  | <b>-0.473*</b> | 0.097          | <b>0.821*</b>  |
|   |                              |         | (0.127)        | (0.585) | <b>(0.030)</b> | (0.674)        | <b>(0.000)</b> |
| 5 | <i>Juniperus tibetica</i>    | May     | 0.159          | -0.017  | -0.026         | -0.106         | <b>0.815*</b>  |
|   |                              |         | (0.528)        | (0.948) | (0.919)        | (0.677)        | <b>(0.000)</b> |
|   |                              | Jun     | 0.091          | -0.134  | 0.021          | -0.048         | <b>0.823*</b>  |
|   |                              |         | (0.720)        | (0.595) | (0.935)        | (0.849)        | <b>(0.000)</b> |
|   |                              | Jul     | -0.072         | -0.108  | <b>0.460#</b>  | -0.187         | <b>0.653*</b>  |
|   |                              |         | (0.776)        | (0.670) | <b>(0.055)</b> | (0.458)        | <b>(0.003)</b> |
|   |                              | Aug     | -0.066         | 0.099   | <b>0.438#</b>  | <b>0.630*</b>  | <b>0.784*</b>  |
|   |                              |         | (0.794)        | (0.695) | <b>(0.069)</b> | <b>(0.005)</b> | <b>(0.000)</b> |
|   |                              | May-Jun | 0.187          | -0.098  | -0.030         | -0.144         | <b>0.827*</b>  |
|   |                              |         | (0.458)        | (0.700) | (0.906)        | (0.568)        | <b>(0.000)</b> |
|   |                              | Jun-Aug | -0.238         | 0.187   | 0.326          | 0.269          | <b>0.698*</b>  |
|   |                              |         | (0.341)        | (0.457) | (0.187)        | (0.280)        | <b>(0.001)</b> |
|   |                              | May-Aug | -0.254         | 0.313   | 0.318          | 0.234          | <b>0.757*</b>  |
|   |                              |         | (0.310)        | (0.206) | (0.198)        | (0.350)        | <b>(0.000)</b> |
| 6 | <i>Juniperus przewalskii</i> | May     | 0.195          | 0.036   | -0.040         | 0.149          | <b>0.777*</b>  |
|   |                              |         | (0.339)        | (0.861) | (0.847)        | (0.467)        | <b>(0.000)</b> |
|   |                              | Jun     | -0.025         | -0.216  | 0.191          | 0.187          | <b>0.786*</b>  |
|   |                              |         | (0.903)        | (0.289) | (0.349)        | (0.361)        | <b>(0.000)</b> |

|   |                              |         |                   |                                 |                                  |                                 |                                 |
|---|------------------------------|---------|-------------------|---------------------------------|----------------------------------|---------------------------------|---------------------------------|
|   |                              | Jul     | -0.002<br>(0.993) | 0.209<br>(0.306)                | <b>0.359#</b><br><b>(0.072)</b>  | 0.254<br>(0.211)                | <b>0.741*</b><br><b>(0.000)</b> |
|   |                              | Aug     | -0.163<br>(0.427) | 0.193<br>(0.346)                | 0.237<br>(0.243)                 | 0.180<br>(0.379)                | <b>0.770*</b><br><b>(0.000)</b> |
|   |                              | May-Jun | 0.190<br>(0.354)  | -0.114<br>(0.579)               | 0.080<br>(0.697)                 | 0.241<br>(0.236)                | <b>0.782*</b><br><b>(0.000)</b> |
|   |                              | Jun-Aug | -0.235<br>(0.248) | 0.313<br>(0.119)                | <b>0.568*</b><br><b>(0.002)</b>  | <b>0.535*</b><br><b>(0.005)</b> | <b>0.741*</b><br><b>(0.000)</b> |
|   |                              | May-Aug | -0.075<br>(0.716) | 0.208<br>(0.309)                | <b>0.417*</b><br><b>(0.034)</b>  | <b>0.433*</b><br><b>(0.027)</b> | <b>0.752*</b><br><b>(0.000)</b> |
| 7 | <i>Juniperus przewalskii</i> | May     | -0.285<br>(0.157) | 0.034<br>(0.868)                | <b>-0.371#</b><br><b>(0.062)</b> | <b>0.406*</b><br><b>(0.040)</b> | <b>0.499*</b><br><b>(0.010)</b> |
|   |                              | Jun     | 0.156<br>(0.448)  | 0.101<br>(0.623)                | 0.023<br>(0.912)                 | <b>0.468*</b><br><b>(0.016)</b> | <b>0.415*</b><br><b>(0.035)</b> |
|   |                              | Jul     | -0.147<br>(0.473) | -0.110<br>(0.594)               | -0.087<br>(0.673)                | -0.099<br>(0.630)               | <b>0.444*</b><br><b>(0.023)</b> |
|   |                              | Aug     | -0.124<br>(0.546) | 0.154<br>(0.453)                | -0.032<br>(0.876)                | -0.048<br>(0.815)               | <b>0.390*</b><br><b>(0.049)</b> |
|   |                              | May-Jun | 0.006<br>(0.977)  | 0.100<br>(0.628)                | -0.281<br>(0.164)                | <b>0.503*</b><br><b>(0.009)</b> | <b>0.441*</b><br><b>(0.024)</b> |
|   |                              | Jun-Aug | -0.061<br>(0.767) | 0.082<br>(0.692)                | 0.004<br>(0.986)                 | 0.310<br>(0.123)                | <b>0.285</b><br><b>(0.158)</b>  |
|   |                              | May-Aug | -0.076<br>(0.712) | 0.140<br>(0.495)                | -0.130<br>(0.528)                | <b>0.415*</b><br><b>(0.035)</b> | 0.302<br>(0.134)                |
| 8 | <i>Juniperus przewalskii</i> | May     | 0.028<br>(0.893)  | <b>0.417*</b><br><b>(0.034)</b> | -0.178<br>(0.383)                | 0.277<br>(0.171)                | <b>0.592*</b><br><b>(0.001)</b> |
|   |                              | Jun     | 0.076<br>(0.711)  | 0.250<br>(0.218)                | <b>0.384#</b><br><b>(0.053)</b>  | 0.125<br>(0.542)                | <b>0.470*</b><br><b>(0.016)</b> |

|    |                                                      |         |                                  |                                 |                   |                                 |                                 |
|----|------------------------------------------------------|---------|----------------------------------|---------------------------------|-------------------|---------------------------------|---------------------------------|
|    |                                                      | Jul     | -0.104<br>(0.614)                | -0.034<br>(0.869)               | 0.249<br>(0.220)  | -0.069<br>(0.736)               | <b>0.437*</b><br><b>(0.026)</b> |
|    |                                                      | Aug     | <b>-0.421*</b><br><b>(0.032)</b> | <b>0.446*</b><br><b>(0.022)</b> | -0.268<br>(0.185) | 0.189<br>(0.355)                | <b>0.564*</b><br><b>(0.003)</b> |
|    |                                                      | May-Jun | 0.111<br>(0.590)                 | 0.296<br>(0.142)                | 0.126<br>(0.538)  | 0.214<br>(0.294)                | <b>0.534*</b><br><b>(0.005)</b> |
|    |                                                      | Jun-Aug | -0.142<br>(0.487)                | 0.279<br>(0.168)                | 0.126<br>(0.538)  | 0.084<br>(0.682)                | <b>0.442*</b><br><b>(0.024)</b> |
|    |                                                      | May-Aug | -0.107<br>(0.601)                | <b>0.345#</b><br><b>(0.084)</b> | 0.013<br>(0.948)  | 0.145<br>(0.480)                | <b>0.482*</b><br><b>(0.013)</b> |
| 9  | <i>Juniperus przewalskii</i>                         | May     | 0.137<br>(0.576)                 | 0.104<br>(0.672)                | -0.297<br>(0.217) | 0.249<br>(0.304)                | 0.301<br>(0.211)                |
|    |                                                      | Jun     | -0.285<br>(0.237)                | 0.206<br>(0.397)                | 0.280<br>(0.246)  | 0.094<br>(0.701)                | 0.339<br>(0.156)                |
|    |                                                      | Jul     | <b>-0.406#</b><br><b>(0.084)</b> | 0.378<br>(0.110)                | 0.234<br>(0.335)  | -0.062<br>(0.802)               | 0.298<br>(0.216)                |
|    |                                                      | Aug     | 0.086<br>(0.727)                 | 0.248<br>(0.306)                | 0.057<br>(0.817)  | -0.148<br>(0.545)               | 0.042<br>(0.865)                |
|    |                                                      | May-Jun | -0.302<br>(0.209)                | 0.384<br>(0.105)                | -0.102<br>(0.678) | 0.219<br>(0.368)                | <b>0.412#</b><br><b>(0.080)</b> |
|    |                                                      | Jun-Aug | -0.250<br>(0.302)                | <b>0.451#</b><br><b>(0.053)</b> | 0.223<br>(0.359)  | -0.083<br>(0.735)               | 0.219<br>(0.368)                |
|    |                                                      | May-Aug | -0.274<br>(0.256)                | <b>0.563*</b><br><b>(0.012)</b> | 0.104<br>(0.670)  | 0.022<br>(0.928)                | 0.292<br>(0.226)                |
| 10 | <i>Picea likiangensis</i><br>var. <i>balfouriana</i> | May     | 0.350<br>(0.119)                 | -0.083<br>(0.721)               | 0.081<br>(0.726)  | -0.026<br>(0.910)               | <b>0.479*</b><br><b>(0.028)</b> |
|    |                                                      | Jun     | <b>0.410#</b><br><b>(0.065)</b>  | 0.055<br>(0.813)                | 0.337<br>(0.135)  | <b>0.441*</b><br><b>(0.045)</b> | <b>0.614*</b><br><b>(0.003)</b> |

|    |                        |         |         |                |                |                |                |
|----|------------------------|---------|---------|----------------|----------------|----------------|----------------|
|    |                        | Jul     | -0.311  | 0.097          | -0.194         | -0.191         | <b>0.676*</b>  |
|    |                        |         | (0.170) | (0.677)        | (0.399)        | (0.408)        | <b>(0.001)</b> |
|    |                        | Aug     | -0.262  | <b>0.423#</b>  | -0.193         | 0.177          | <b>0.637*</b>  |
|    |                        |         | (0.252) | <b>(0.056)</b> | (0.403)        | (0.442)        | <b>(0.002)</b> |
|    |                        | May-Jun | 0.367   | 0.034          | 0.240          | 0.274          | <b>0.449*</b>  |
|    |                        |         | (0.101) | (0.885)        | (0.294)        | (0.229)        | <b>(0.041)</b> |
|    |                        | Jun-Aug | 0.032   | <b>0.375#</b>  | 0.026          | 0.318          | <b>0.489*</b>  |
|    |                        |         | (0.891) | <b>(0.094)</b> | (0.911)        | (0.160)        | <b>(0.024)</b> |
|    |                        | May-Aug | 0.193   | 0.354          | 0.118          | <b>0.374#</b>  | 0.362          |
|    |                        |         | (0.401) | (0.115)        | (0.610)        | <b>(0.095)</b> | (0.107)        |
| 11 | <i>Abies faxoniana</i> | May     | 0.026   | -0.045         | -0.099         | -0.078         | <b>0.901*</b>  |
|    |                        |         | (0.904) | (0.835)        | (0.647)        | (0.717)        | <b>(0.000)</b> |
|    |                        | Jun     | -0.092  | -0.214         | -0.112         | 0.000          | <b>0.879*</b>  |
|    |                        |         | (0.671) | (0.314)        | (0.603)        | (1.000)        | <b>(0.000)</b> |
|    |                        | Jul     | -0.110  | 0.087          | -0.020         | -0.155         | <b>0.858*</b>  |
|    |                        |         | (0.610) | (0.685)        | (0.926)        | (0.469)        | <b>(0.000)</b> |
|    |                        | Aug     | 0.014   | 0.092          | -0.222         | 0.147          | <b>0.840*</b>  |
|    |                        |         | (0.947) | (0.670)        | (0.296)        | (0.492)        | <b>(0.000)</b> |
|    |                        | May-Jun | 0.000   | -0.169         | -0.073         | -0.007         | <b>0.887*</b>  |
|    |                        |         | (0.998) | (0.431)        | (0.733)        | (0.975)        | <b>(0.000)</b> |
|    |                        | Jun-Aug | -0.065  | -0.042         | -0.176         | -0.065         | <b>0.830*</b>  |
|    |                        |         | (0.763) | (0.846)        | (0.411)        | (0.763)        | <b>(0.000)</b> |
|    |                        | May-Aug | -0.075  | -0.016         | -0.158         | -0.083         | <b>0.826*</b>  |
|    |                        |         | (0.728) | (0.941)        | (0.462)        | (0.698)        | <b>(0.000)</b> |
| 12 | <i>Abies forrestii</i> | May     | -0.133  | 0.381          | <b>0.668*</b>  | -0.377         | <b>0.884*</b>  |
|    |                        |         | (0.612) | (0.132)        | <b>(0.003)</b> | (0.135)        | <b>(0.000)</b> |
|    |                        | Jun     | 0.042   | 0.047          | 0.231          | 0.205          | <b>0.780*</b>  |
|    |                        |         | (0.873) | (0.856)        | (0.372)        | (0.430)        | <b>(0.000)</b> |

|    |                     |         |                                  |                                 |                                  |                                 |                                 |
|----|---------------------|---------|----------------------------------|---------------------------------|----------------------------------|---------------------------------|---------------------------------|
|    |                     | Jul     | -0.403<br>(0.109)                | 0.395<br>(0.117)                | -0.385<br>(0.127)                | 0.331<br>(0.195)                | <b>0.906*</b><br><b>(0.000)</b> |
|    |                     | Aug     | 0.125<br>(0.632)                 | <b>0.648*</b><br><b>(0.005)</b> | <b>0.511*</b><br><b>(0.036)</b>  | <b>0.550*</b><br><b>(0.022)</b> | <b>0.808*</b><br><b>(0.000)</b> |
|    |                     | May-Jun | 0.010<br>(0.970)                 | 0.088<br>(0.738)                | <b>0.474#</b><br><b>(0.055)</b>  | 0.058<br>(0.824)                | <b>0.796*</b><br><b>(0.000)</b> |
|    |                     | Jun-Aug | -0.031<br>(0.905)                | 0.293<br>(0.254)                | 0.162<br>(0.535)                 | 0.313<br>(0.221)                | <b>0.747*</b><br><b>(0.001)</b> |
|    |                     | May-Aug | 0.200<br>(0.442)                 | 0.144<br>(0.581)                | <b>0.550*</b><br><b>(0.022)</b>  | 0.404<br>(0.108)                | <b>0.720*</b><br><b>(0.001)</b> |
| 13 | <i>Picea</i>        | May     | -0.104<br>(0.701)                | 0.016<br>(0.953)                | 0.005<br>(0.986)                 | -0.012<br>(0.965)               | 0.394<br>(0.131)                |
|    | <i>likiangensis</i> | Jun     | <b>-0.443#</b><br><b>(0.086)</b> | <b>0.449#</b><br><b>(0.081)</b> | <b>-0.659*</b><br><b>(0.005)</b> | <b>0.585*</b><br><b>(0.017)</b> | <b>0.749*</b><br><b>(0.001)</b> |
|    |                     | Jul     | -0.080<br>(0.769)                | 0.296<br>(0.266)                | -0.129<br>(0.634)                | -0.072<br>(0.790)               | <b>0.493#</b><br><b>(0.053)</b> |
|    |                     | Aug     | -0.393<br>(0.132)                | 0.186<br>(0.490)                | -0.011<br>(0.968)                | 0.360<br>(0.171)                | <b>0.477#</b><br><b>(0.062)</b> |
|    |                     | May-Jun | -0.247<br>(0.356)                | 0.109<br>(0.689)                | -0.253<br>(0.344)                | 0.259<br>(0.332)                | <b>0.507*</b><br><b>(0.045)</b> |
|    |                     | Jun-Aug | -0.340<br>(0.198)                | 0.385<br>(0.141)                | -0.209<br>(0.437)                | 0.210<br>(0.436)                | <b>0.538*</b><br><b>(0.032)</b> |
|    |                     | May-Aug | -0.403<br>(0.121)                | 0.363<br>(0.167)                | -0.196<br>(0.467)                | 0.304<br>(0.253)                | <b>0.533*</b><br><b>(0.033)</b> |

**Supplementary Table 6.** Partial correlation coefficients of multiple linear regressions for relationships of 10-year moving averages of tree-ring width index to previous and current year's early-season (May to June) mean minimum temperature (PT, T) and precipitation (PP, P) and the atmospheric CO<sub>2</sub> concentration, based on the chronological data (since 1986) of tree-ring width index across 8 tree species and 13 treeline sites on the Tibetan Plateau collected from this study and the literature. Detailed sites information is found in Supplementary Table 1. The statistical significance is estimated by two-tailed t-test with no adjustment for multiple comparisons. *P* values are shown in parentheses. Significant level: #*P* < 0.10, \**P* < 0.05.

| Site ID | Species                      | Partial correlation coefficient |                |                 |                |                 |
|---------|------------------------------|---------------------------------|----------------|-----------------|----------------|-----------------|
|         |                              | PT                              | PP             | T               | P              | CO <sub>2</sub> |
| 1       | <i>Abies georgei</i> var.    | -0.244                          | 0.145          | - <b>0.408#</b> | 0.328          | <b>0.893*</b>   |
|         | <i>smithii</i>               | (0.314)                         | (0.552)        | <b>(0.083)</b>  | (0.170)        | <b>(0.000)</b>  |
| 2       | <i>Juniperus saltuaria</i>   | -0.022                          | 0.061          | -0.292          | 0.265          | <b>0.939*</b>   |
|         |                              | (0.928)                         | (0.804)        | (0.225)         | (0.274)        | <b>(0.000)</b>  |
| 3       | <i>Juniperus tibetica</i>    | 0.354                           | -0.289         | -0.032          | 0.354          | <b>0.679*</b>   |
|         |                              | (0.350)                         | (0.450)        | (0.935)         | (0.351)        | <b>(0.044)</b>  |
| 4       | <i>Juniperus tibetica</i>    | 0.425                           | -0.088         | -0.338          | -0.179         | <b>0.989*</b>   |
|         |                              | (0.168)                         | (0.787)        | (0.283)         | (0.578)        | <b>(0.000)</b>  |
| 5       | <i>Juniperus tibetica</i>    | 0.296                           | 0.290          | <b>0.722*</b>   | -0.607         | <b>0.947*</b>   |
|         |                              | (0.439)                         | (0.448)        | <b>(0.028)</b>  | (0.083)        | <b>(0.000)</b>  |
| 6       | <i>Juniperus przewalskii</i> | 0.123                           | -0.186         | -0.036          | <b>0.438#</b>  | <b>0.953*</b>   |
|         |                              | (0.639)                         | (0.475)        | (0.891)         | <b>(0.079)</b> | <b>(0.000)</b>  |
| 7       | <i>Juniperus przewalskii</i> | -0.200                          | 0.240          | -0.247          | 0.345          | <b>0.786*</b>   |
|         |                              | (0.441)                         | (0.353)        | (0.339)         | (0.175)        | <b>(0.000)</b>  |
| 8       | <i>Juniperus przewalskii</i> | 0.243                           | <b>0.726*</b>  | -0.049          | -0.080         | <b>0.892*</b>   |
|         |                              | (0.348)                         | <b>(0.001)</b> | (0.852)         | (0.761)        | <b>(0.000)</b>  |
| 9       | <i>Juniperus przewalskii</i> | -0.200                          | 0.303          | 0.054           | 0.101          | <b>0.728*</b>   |
|         |                              | (0.579)                         | (0.395)        | (0.883)         | (0.781)        | <b>(0.017)</b>  |

|    |                           |                |                |                |                |                |
|----|---------------------------|----------------|----------------|----------------|----------------|----------------|
| 10 | <i>Picea likiangensis</i> | <b>0.818*</b>  | <b>-0.503#</b> | <b>0.687*</b>  | -0.016         | <b>0.868*</b>  |
|    | var. <i>balfouriana</i>   | <b>(0.001)</b> | <b>(0.096)</b> | <b>(0.014)</b> | (0.960)        | <b>(0.000)</b> |
| 11 | <i>Abies faxoniana</i>    | -0.043         | -0.426         | -0.193         | <b>0.483#</b>  | <b>0.877*</b>  |
|    |                           | (0.879)        | (0.113)        | (0.490)        | <b>(0.068)</b> | <b>(0.000)</b> |
| 12 | <i>Abies forrestii</i>    | <b>0.688#</b>  | -0.393         | <b>0.788*</b>  | -0.160         | <b>0.927*</b>  |
|    |                           | <b>(0.059)</b> | (0.335)        | <b>(0.020)</b> | (0.706)        | <b>(0.001)</b> |
| 13 | <i>Picea likiangensis</i> | -0.015         | -0.339         | 0.206          | -0.335         | 0.281          |
|    |                           | (0.975)        | (0.456)        | (0.768)        | (0.462)        | (0.542)        |

---



References of data source in Supplementary Table 1:

- [1] Li J, Fang K, Tao Y, Cook ER. (2011-09-01): NOAA/WDS Paleoclimatology - Li - Xiangchen - ABFO - ITRDB CHIN017. NOAA National Centers for Environmental Information. <https://doi.org/10.25921/zabf-zc09>. Accessed 2017-6-21.
- [2] Wang JL, Yang B, Qin C, Kang SY, He MH, Wang ZY. (2016-10-08): NOAA/WDS Paleoclimatology - Wang - Qamdo 2 - JUTI - ITRDB CHIN074. NOAA National Centers for Environmental Information. <https://doi.org/10.25921/njz0-5803>. Accessed 2017-6-21.
- [3] Wright WE, Li J, Fang K, Tao Y, Cook ER. (2011-09-01): NOAA/WDS Paleoclimatology - Wright - Baimang Snow Mountain - JUTI - ITRDB CHIN024. NOAA National Centers for Environmental Information. <https://doi.org/10.25921/kmee-aj42>. Accessed 2017-6-21.
- [4] Song WQ, Zhu LJ, Zhang X, Wang XC, Zhang YD. 2018. Comparison of growth-climate relationship of *Sabina przewalskii* at different timberlines along a precipitation gradient in the northeast Qinghai-Xizang Plateau, China. *Chinese Journal of Plant Ecology*, 42 (1): 66–77.
- [5] Yang B, Qin C, Wang JL, He MH, Melvin TM, Osborn TJ, Briffa KR. (2014-02-10): NOAA/WDS Paleoclimatology - Yang - Zhamashi - JUPR - ITRDB CHIN071. NOAA National Centers for Environmental Information. <https://doi.org/10.25921/nc6n-rb25>. Accessed 2017-6-21.
- [6] Liu J, Deng X, Lv LX. 2015. Relationship of tree growth and climatic factors at treeline of *Picea likiangensis* var. *balfouriana* forest in Basu County, Xizang. *Chinese Journal of Plant Ecology*, 39 (5): 442–452.
- [7] Guo BD, Wang XC, Zhang YD. 2019. Effects of accumulated and threshold temperatures on the radial growth of *Abies faxoniana* in the alpine timberline, Western Sichuan Plateau. *Acta Ecologica Sinica*, 39 (3): 895–904.
- [8] Li J, Fang K, Tao Y, Cook ER. (2011-09-01): NOAA/WDS Paleoclimatology - Li - Daocheng - ABFO - ITRDB CHIN018. NOAA National Centers for Environmental Information. <https://doi.org/10.25921/hx6b-fm18>. Accessed 2017-6-21.
- [9] Fan ZX. (2013-05-06): NOAA/WDS Paleoclimatology - Fan - Hengduan Mountains 10GK\_P\_r - PCLI - ITRDB CHIN037. NOAA National Centers for Environmental Information. <https://doi.org/10.25921/p6z5-9g74>. Accessed 2017-6-21.
